# Supplementary material for: Strut Deformation in CFRP-Strengthened Reinforced Concrete Deep Beams
Source: Hindawi journal article supplement (doi:10.1155/2014/265879), 2014-01-01
Supplement: f1 [file 265879.f1.pdf]

## Appendix

The Tables 1 and 2 represent the average value of transverse strain of ordinary and CFRP-strengthened RC struts from experiment respectively.

Table 1. Average transverse strain of ordinary unstrengthened RC struts

| Load (kN)-CFRP | $\epsilon_{1\text{-ordinary}}$ |          |          |          |          |          |
|----------------|--------------------------------|----------|----------|----------|----------|----------|
|                | a/d=0.75                       | a/d=1.00 | a/d=1.25 | a/d=1.50 | a/d=1.75 | a/d=2.00 |
| 0.00           | ---                            | ---      | ---      | ---      | ---      | ---      |
| 50.00          | 0.0001                         | 0.0002   | 0.0002   | 0.0002   | 0.0005   | 0.0019   |
| 100.00         | 0.0001                         | 0.0004   | 0.0005   | 0.0008   | 0.0013   | 0.0041   |
| 150.00         | 0.0003                         | 0.0006   | 0.0009   | 0.0014   | 0.0033   | 0.0061   |
| 200.00         | 0.0004                         | 0.0008   | 0.0012   | 0.0022   | 0.0077   | 0.0130   |
| 250.00         | 0.0006                         | 0.0009   | 0.0021   | 0.0032   | 0.0098   | 0.0158   |
| 300.00         | 0.0008                         | 0.0013   | 0.0028   | 0.0056   | 0.0123   | 0.0173   |
| 350.00         | 0.0010                         | 0.0015   | 0.0040   | 0.0072   | 0.0144   | 0.0186   |
| 400.00         | 0.0012                         | 0.0020   | 0.0052   | 0.0079   | 0.0155   | ---      |
| 450.00         | 0.0014                         | 0.0029   | 0.0058   | 0.0087   | ---      | ---      |
| 500.00         | 0.0019                         | 0.0032   | 0.0062   | 0.0095   | ---      | ---      |
| 550.00         | 0.0022                         | 0.0035   | 0.0067   | 0.0098   | ---      | ---      |
| 600.00         | 0.0025                         | 0.0040   | 0.0071   | ---      | ---      | ---      |
| 650.00         | 0.0028                         | 0.0045   | ---      | ---      | ---      | ---      |
| 700.00         | 0.0030                         | 0.0050   | ---      | ---      | ---      | ---      |
| 750.00         | 0.0032                         | ---      | ---      | ---      | ---      | ---      |

Table 2. Average transverse strain of CFRP-strengthened RC struts

| Load (kN)-CFRP | $\epsilon_{1\text{-CFRP-strengthened}}$ |          |          |          |          |          |
|----------------|-----------------------------------------|----------|----------|----------|----------|----------|
|                | a/d=0.75                                | a/d=1.00 | a/d=1.25 | a/d=1.50 | a/d=1.75 | a/d=2.00 |
| 0.00           | 0.0000                                  | 0.0000   | 0.0000   | 0.0000   | 0.0000   | 0.0000   |
| 50.00          | 0.0001                                  | 0.0002   | 0.0002   | 0.0002   | 0.0005   | 0.0018   |
| 100.00         | 0.0001                                  | 0.0003   | 0.0004   | 0.0007   | 0.0012   | 0.0037   |
| 150.00         | 0.0002                                  | 0.0005   | 0.0008   | 0.0012   | 0.0030   | 0.0052   |
| 200.00         | 0.0003                                  | 0.0007   | 0.0011   | 0.0019   | 0.0067   | 0.0104   |
| 250.00         | 0.0005                                  | 0.0008   | 0.0016   | 0.0028   | 0.0089   | 0.0138   |
| 300.00         | 0.0007                                  | 0.0011   | 0.0021   | 0.0048   | 0.0109   | 0.0149   |
| 350.00         | 0.0009                                  | 0.0013   | 0.0033   | 0.0061   | 0.0124   | 0.0156   |
| 400.00         | 0.0010                                  | 0.0017   | 0.0043   | 0.0071   | 0.0132   | 0.0165   |
| 450.00         | 0.0013                                  | 0.0023   | 0.0048   | 0.0077   | 0.0138   | 0.0170   |
| 500.00         | 0.0016                                  | 0.0026   | 0.0054   | 0.0080   | 0.0143   |          |
| 550.00         | 0.0019                                  | 0.0029   | 0.0058   | 0.0083   | ---      | ---      |
| 600.00         | 0.0021                                  | 0.0031   | 0.0061   | 0.0083   | ---      | ---      |
| 650.00         | 0.0023                                  | 0.0032   | 0.0063   | 0.0084   | ---      | ---      |
| 700.00         | 0.0024                                  | 0.0033   | 0.0064   | ---      | ---      | ---      |
| 750.00         | 0.0025                                  | 0.0033   | ---      | ---      | ---      | ---      |
| 800.00         | 0.0025                                  | 0.0035   | ---      | ---      | ---      | ---      |
| 850.00         | 0.0026                                  | 0.0035   | ---      | ---      | ---      | ---      |
| 900.0000       | 0.0026                                  | ---      | ---      | ---      | ---      | ---      |
